8. Aygen, M. M., and Braunwald, E.: Studies on Starling's law of the heart, VIII. Mechanical properties of human myocardium studies in vivo, *Circulation* 26: 516, 1962.
9. Fisher, R. A.: *Statistical Methods for Research Workers* (12th ed.). New York, Hafner, 1954, p. 41.
10. Raventos, J.: The action of halothane—a new volatile anesthetic, *Brit. J. Pharmacol.* 11: 394, 1956.
11. Burn, J. H., Epstein, H. G., Geigan, G. A., and Paton, W. D. M.: Some pharmacological actions of Fluothane, *Brit. Med. J.* 2: 479, 1957.
12. Purchase, I. F. H.: The effect of halothane on the isolated cat heart, *Brit. J. Anaesth.* 38: 80, 1966.
13. Price, H. L., and Price, M. L.: Has halothane a predominant circulatory action? *ANESTHESIOLOGY* 27: 764, 1966.
14. Millar, R. A., and Biscoe, T. J.: Postganglionic sympathetic discharge and the effect of inhalation anaesthetics, *Brit. J. Anaesth.* 38: 92, 1966.
15. Flacke, W., and Gillis, R. A.: Muscarinic ganglionic transmission, *Pharmacologist* 8: 193, 1966.
16. Garfield, J. M., Gillis, R. A., and Alper, M. H.: The effect of anesthetics on ganglionic transmission, *Fed. Proc.* 26: 503, 1967.
17. Eccles, J. C.: *The Physiology of Synapses*. Heidelberg, Springer-Verlag, 1964, pp. 131–137.
18. Eccles, R. M., and Libet, B.: Origin and blockade of the synaptic responses of curarized sympathetic ganglia, *J. Physiol (London)* 157: 484, 1961.
19. Takeshige, C., and Volle, R. L.: Similarities in the ganglionic actions of calcium ions and atropine, *J. Pharmacol. Exp. Ther.* 145: 173, 1964.
20. Volle, R. L.: Modification by drugs of synaptic mechanisms in autonomic ganglia, *Pharm. Rev.* 18: 839, 1966.
21. Mizeres, N. J.: The origin and course of the cardioaccelerator fibers in the dog, *Anat. Rec.* 132: 261, 1958.
22. Randall, C., and McNally, H.: Augmentor action of the sympathetic cardiac nerves in man, *J. Appl. Physiol.* 15: 629, 1960.
23. Sugai, N., Shimamoto, S., and Etsten, B. E.: Effect of halothane on force-velocity relations and dynamic stiffness of isolated heart muscle, *ANESTHESIOLOGY* 29: 267, 1968.

### Anesthesia

**PREMATURE LABOR** Several investigators have noted that as little as 100 mg. of meperidine given during labor will affect the fetus, as shown by lowering of Apgar scores, need for resuscitation or reduction of minute volume. Presumably, this would be even more true in the premature. In a controlled double-blind study of 1,002 premature infants whose mother received either meperidine 100 mg., meperidine 100 mg. and scopolamine 0.4 mg., scopolamine 0.4 mg., or saline intramuscularly during labor, infants were considered to be born of an "uncomplicated" pregnancy if prematurity was the only aberration. If other complications, such as maternal hypertension, anemia, diabetes, sensitization, bleeding, etc., were involved the infant was placed in the "complicated" group. Low spinal anesthesia was commonly utilized for delivery. Regardless of whether the labor and pregnancy had been complicated, when the mother received 100 mg. of meperidine during labor, there was no clinical effect on death rates, incidence of respiratory distress, Apgar scores, need for resuscitation, or incidence of severe neurologic defects within one year. (Kaltreider, D. F.: *Premature Labor and Meperidine Analgesia*, *Amer. J. Obstet. Gynec.* 99: 989 (Dec.) 1967.)

**ABSTRACTOR'S NOTE:** Because this publication is at variance with results of earlier work, we must await further investigations to ascertain its validity. Determination of infant blood gases and acid-base status in the first few hours of life would be helpful in this regard.
